# Supplementary material for: Optimization and device application potential of oxide–metal–oxide transparent electrode structure
Source: Royal Society of Chemistry journal article supplement (doi:10.1039/c5ra12473e), 2015-01-01
Supplement: c5ra12473e1.pdf [file c5ra12473e1.pdf]

## Supporting Information

### Optimization and Device Application Potential of Oxide-Metal-Oxide Transparent Electrode Structure

Yun Cheol Kim,<sup>a</sup> Su Jeong Lee,<sup>a</sup> Hanearl Jung,<sup>b</sup> Bo-Eun Park,<sup>b</sup> Hyungjun Kim,<sup>b</sup> Woong Lee<sup>\*c</sup>  
and Jae-Min Myoung<sup>\*a</sup>

<sup>a</sup> Department of Materials Science and Engineering, Yonsei University, 50 Yonsei-ro, Seodaemun-gu, Seoul 120-749, Korea

<sup>b</sup> School of Electrical and Electronic Engineering, Yonsei University, 50 Yonsei-ro, Seodaemun-gu, Seoul 120-749, Korea

<sup>c</sup> School of Materials Science and Engineering, Changwon National University, 20 Changwondaehak-ro, Changwon, Gyeongnam 641-774, Korea

\*E-mail address: woonglee@changwon.ac.kr, jmmyoung@yonsei.ac.kr

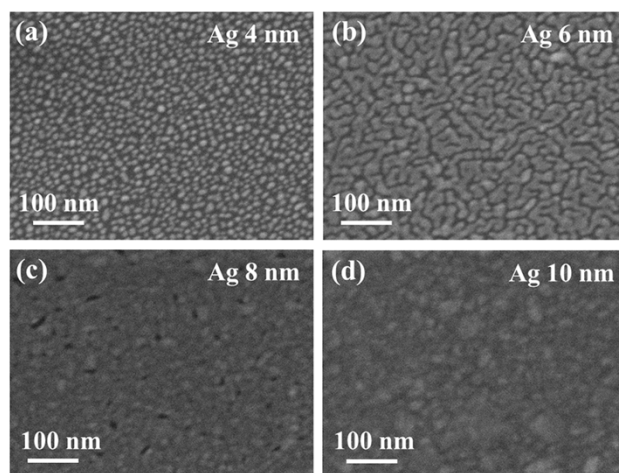

**Fig. S1** SEM micrographs showing the morphological evolution of the Ag mid-layer with increasing thickness.

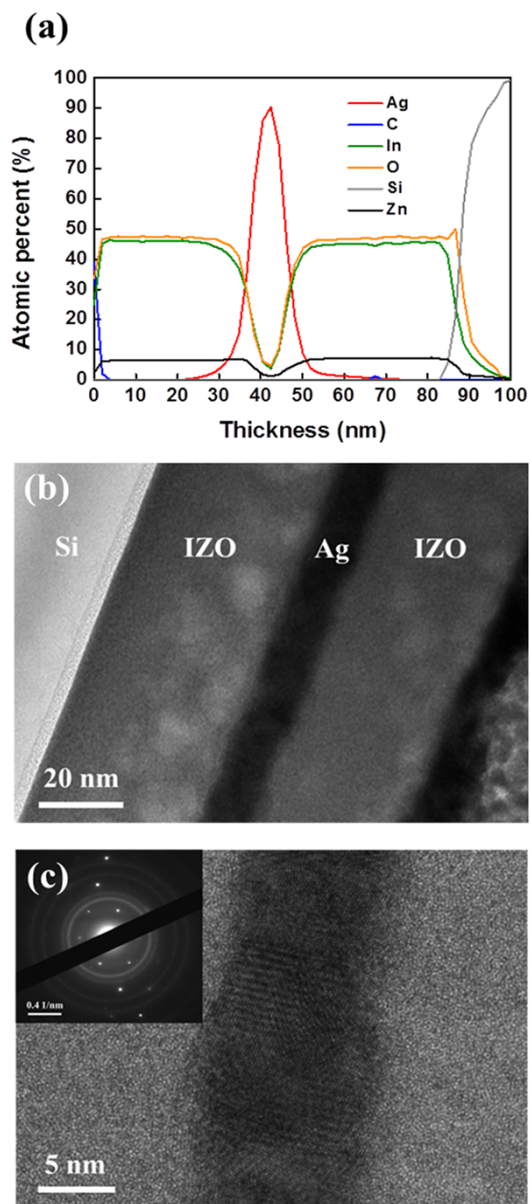

**Fig. S2** Cross-sectional structure of the optimized IZO-Ag-IZO electrode as identified by: (a) XPS depth profile, (b) cross-sectional TEM (JSM-2100F, JEOL) contrast image, and (c) HRTEM image. It is seen that top and bottom IZO layers (amorphous) and Ag mid-layer (polycrystalline) are well defined with compositional uniformity and smooth interfaces.
